# Supplementary material for: Defects in the cytoplasmic assembly of axonemal dynein arms cause morphological abnormalities and dysmotility in sperm cells leading to male infertility
Source: PubMed Central journal article supplement (PMC7909641; doi:10.1371/journal.pgen.1009306), 2021-02-26
Supplement: pgen.1009306.s001.pdf [file pgen.1009306.s001.pdf]

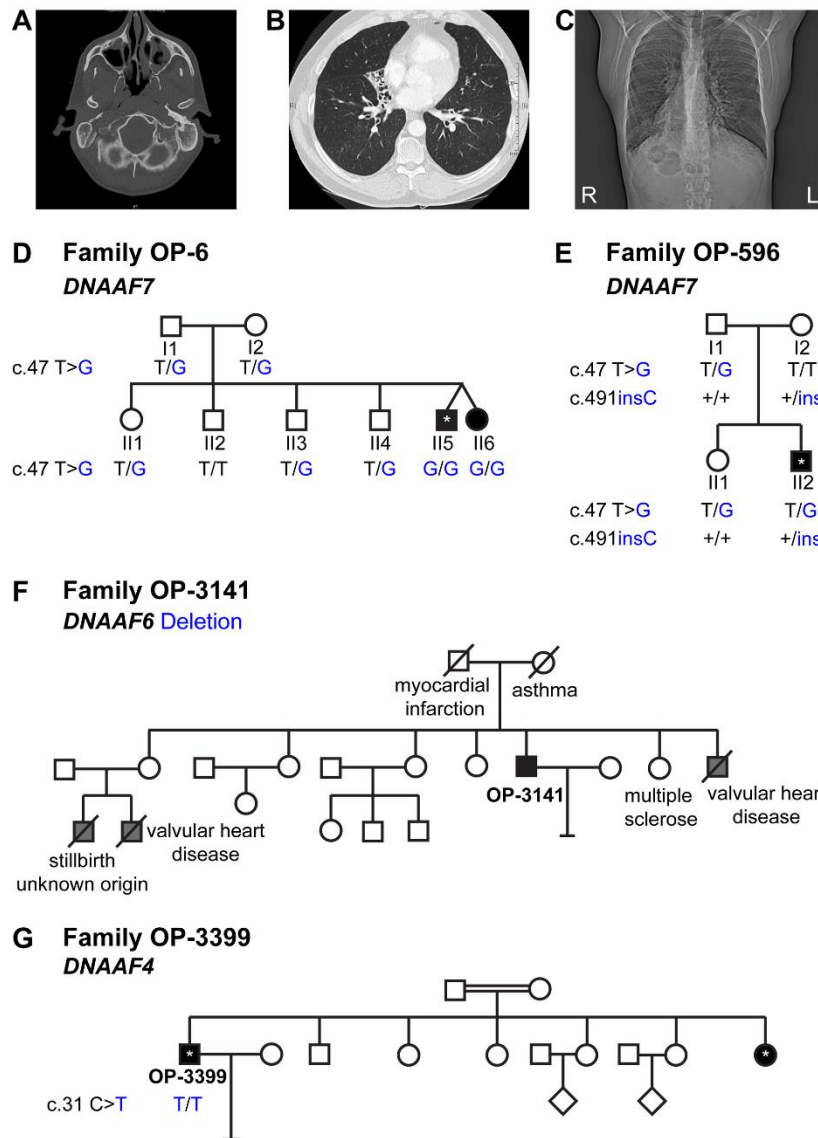

**S1 Fig. Family pedigrees of PCD affected individuals with combined ODA/ IDA defects.** (A) Cranial CT showing chronic sinusitis in OP-1899 III1. (B) CT thorax of OP-3141 displaying destroyed middle lobe and bronchiectasis. (C) Chest X-ray of OP-1899 III1 displaying *situs inversus totalis* (mirror image of thorax and abdominal organs; R: right; L: left). (D and E) Pedigree structure and segregation analysis of PCD-affected families harboring *DNAAF7* mutations. (F) Pedigree structure of PCD-affected family harboring a hemizygous *DNAAF6* mutation. (G) Pedigree structure of PCD-affected family harboring *DNAAF4* mutations. (D-G) Black filled symbols indicate affected individuals. An asterisk indicates *situs inversus*. The plus sign indicates a normal allele and “ins” stands for insertion. Slash sign indicates death of an individual. Segregation analysis for families OP-3141 and OP-3399 (C and D) was not possible due to unavailability of parental DNA and/ or genomic material from siblings.
