# Supplementary material for: Defects in the cytoplasmic assembly of axonemal dynein arms cause morphological abnormalities and dysmotility in sperm cells leading to male infertility
Source: PubMed Central journal article supplement (PMC7909641; doi:10.1371/journal.pgen.1009306), 2021-02-26
Supplement: pgen.1009306.s002.pdf [file pgen.1009306.s002.pdf]

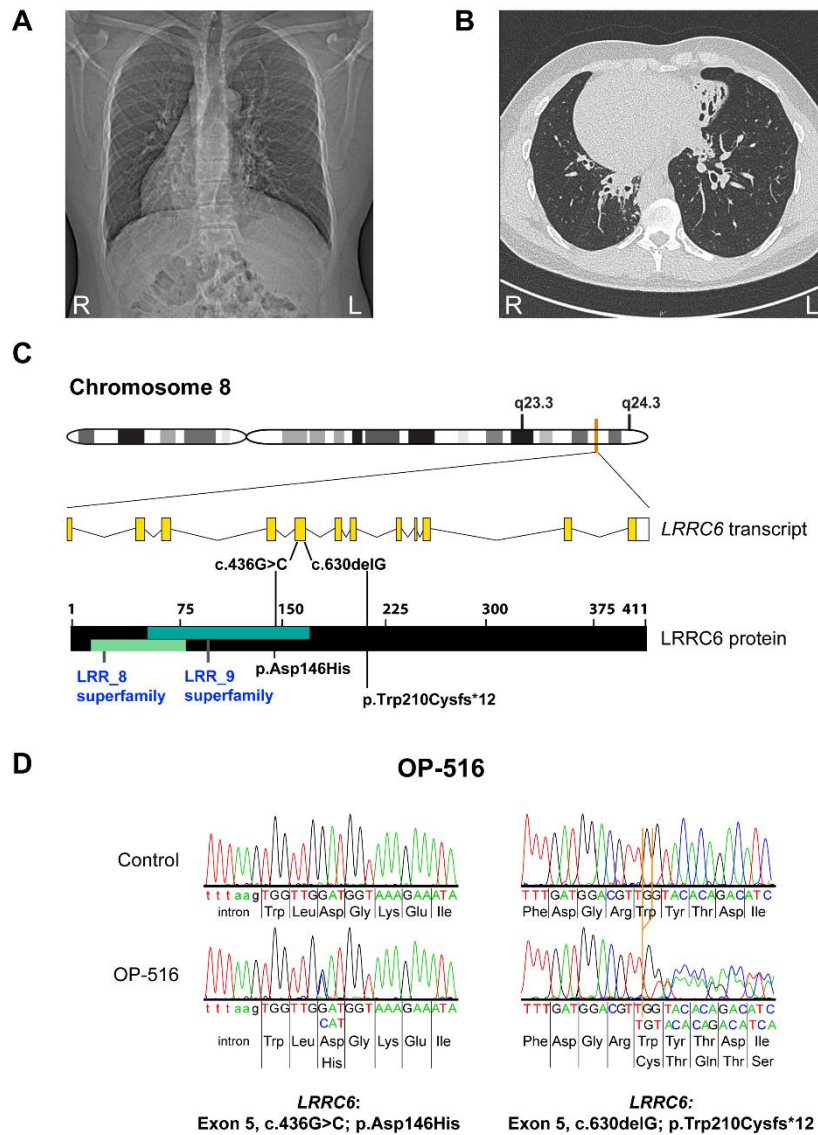

**S2 Fig. Genetic testing in PCD-affected infertile individual OP-516 identifies diseases causing mutations in the gene *LRR6*, encoding a dynein axonemal assembly factor. (A) CT thorax (frontal view) of OP-516 displaying *situs inversus totalis* (mirror image of thorax and abdominal organs; R: right; L: left). (B) CT thorax (transversal view) of OP-516 displaying bilateral bronchiectasis and destruction of the middle lobe (R: right; L: left). (C) *LRR6* (CCDS6365) is located on chromosome 8q24.22 (orange mark in the chromosome schematic). It consists of twelve coding exons, encoding a 466 amino-acid protein. (D) Sanger sequencing for PCD affected individual OP-516 confirmed compound heterozygous mutations in Exon 5 (c.436G>C, p.Asp146His and c.630delG, p.Trp210Cysfs\*12).**
