# Supplementary material for: Defects in the cytoplasmic assembly of axonemal dynein arms cause morphological abnormalities and dysmotility in sperm cells leading to male infertility
Source: PubMed Central journal article supplement (PMC7909641; doi:10.1371/journal.pgen.1009306), 2021-02-26
Supplement: pgen.1009306.s003.pdf [file pgen.1009306.s003.pdf]

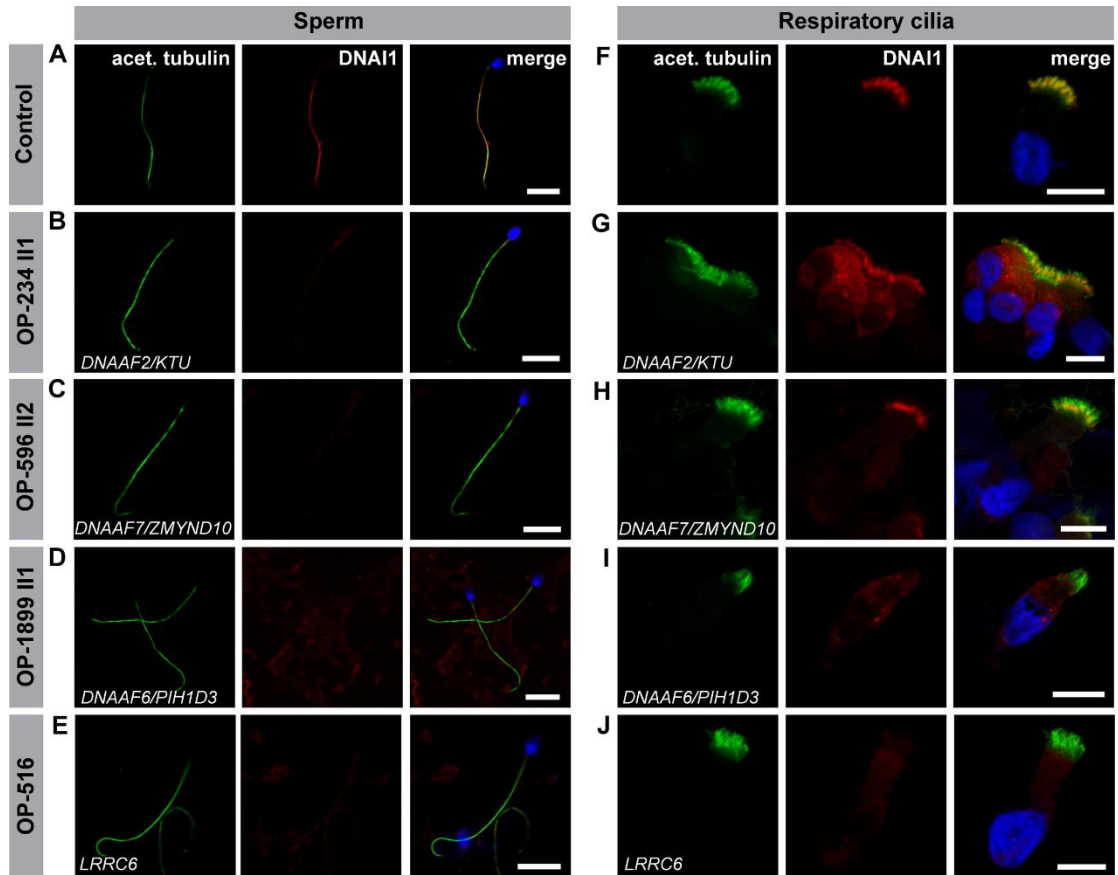

**S3 Fig. Mutant sperm flagella and respiratory cilia show absence or reduction of the ODA intermediate chain DNAI1.** Control (A) and mutant (B-E) sperm cells, as well as control (F) and mutant (G-J) respiratory cells were double-labeled with antibodies directed against acetylated  $\alpha$  tubulin (green) and the outer dynein arm intermediate chain DNAI1 (red). Both antibodies co-localize along the flagella and cilia in cells from the unaffected control (yellow, A, F). In all mutant sperm cells DNAI1 was not detected in the flagellar axoneme (B-E). In mutant respiratory cells of OP-234 II1 (G) and OP-596 II2 (H), DNAI1 localized to the proximal ciliary length, whereas in mutant cells of OP-1899 II1 (I) and OP-516 (J) DNAI1 was not detected in the ciliary axoneme. Nuclei were stained with Hoechst33342 (blue). Scale bars represent 10  $\mu$ m.
