# Supplementary material for: Defects in the cytoplasmic assembly of axonemal dynein arms cause morphological abnormalities and dysmotility in sperm cells leading to male infertility
Source: PubMed Central journal article supplement (PMC7909641; doi:10.1371/journal.pgen.1009306), 2021-02-26
Supplement: pgen.1009306.s005.pdf [file pgen.1009306.s005.pdf]

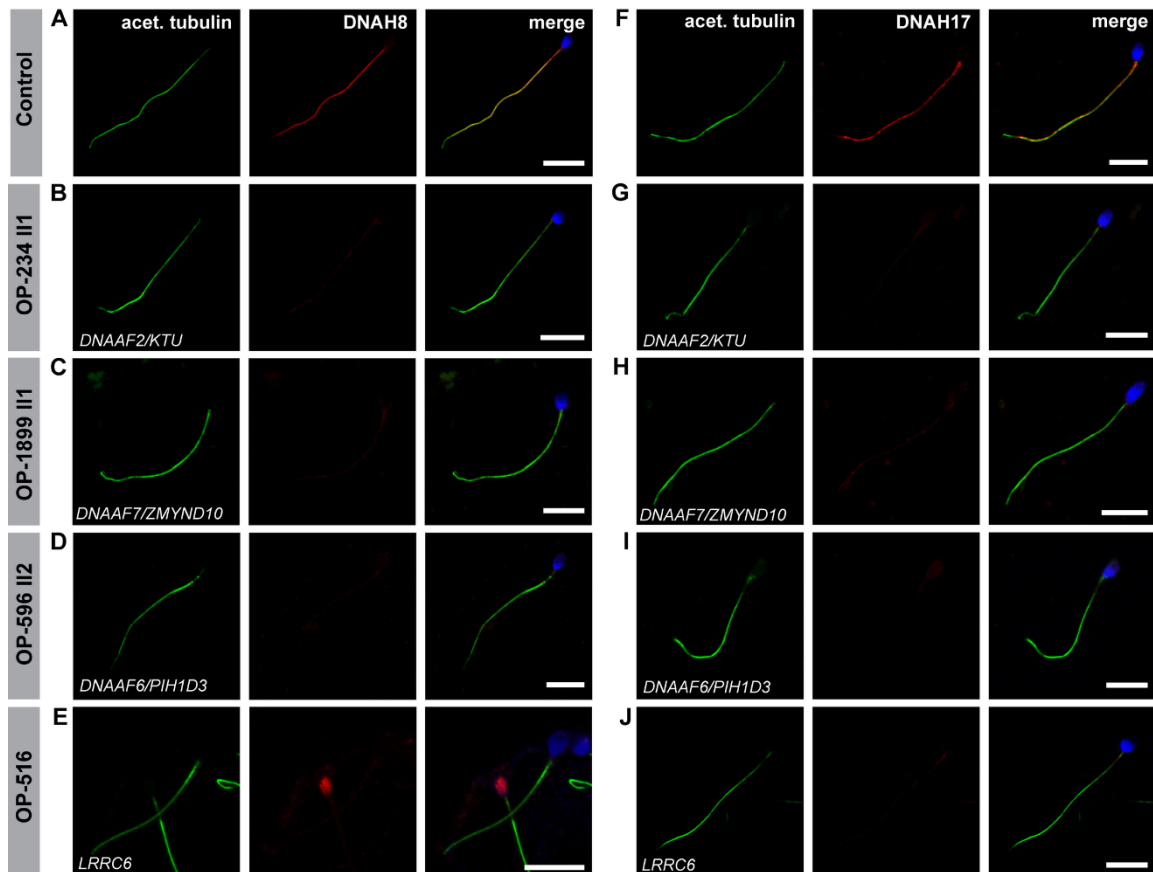

**S5 Fig. Mutant sperm flagella show absence of the sperm specific ODA heavy chains DNAH8 and DNAH17.** Control (A and F) and mutant sperm (B-E and G-J) were double-labeled with antibodies directed against acetylated  $\alpha$  tubulin (green), as flagellar marker, and the sperm specific outer dynein arm heavy chains DNAH8 (A-E, red) and DNAH17 (F-J, red). Both antibodies co-localize along the flagella from the unaffected control (merged image, A, F). In all mutant sperm flagella DNAH8 and DNAH17 were not detected along the flagellar axoneme (B-E, G-J). Nuclei were stained with Hoechst33342 (blue). Scale bars represent 10  $\mu$ m.
