# Supplementary material for: Defects in the cytoplasmic assembly of axonemal dynein arms cause morphological abnormalities and dysmotility in sperm cells leading to male infertility
Source: PubMed Central journal article supplement (PMC7909641; doi:10.1371/journal.pgen.1009306), 2021-02-26
Supplement: pgen.1009306.s006.pdf [file pgen.1009306.s006.pdf]

**A****Quantification of DNAI1 localization - sperm flagella**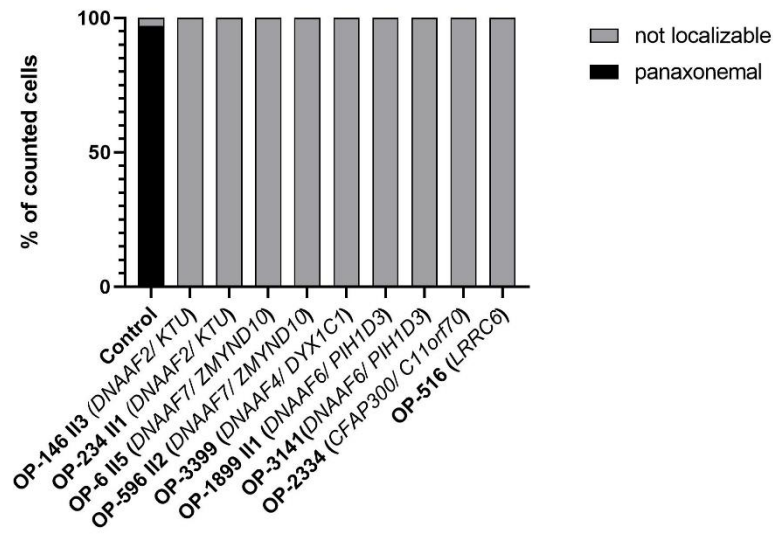**B**

|                                     | panaxonemal | not localizable | n° counted cells | replicates |
|-------------------------------------|-------------|-----------------|------------------|------------|
| <b>Control</b>                      | 356         | 11              | 367              | 3          |
| <b>OP-146 II3 (DNAAF2/ KTU)</b>     | 0           | 330             | 330              | 3          |
| <b>OP-234 II1 (DNAAF2/ KTU)</b>     | 0           | 292             | 292              | 3          |
| <b>OP-6 II5 (DNAAF7/ ZMYND10)</b>   | 0           | 204             | 204              | 3          |
| <b>OP-596 II2 (DNAAF7/ ZMYND10)</b> | 0           | 265             | 265              | 3          |
| <b>OP-3399 (DNAAF4/ DYX1C1)</b>     | 0           | 188             | 188              | 3          |
| <b>OP-1899 II1 (DNAAF6/ PIH1D3)</b> | 0           | 276             | 276              | 3          |
| <b>OP-3141 (DNAAF6/ PIH1D3)</b>     | 0           | 144             | 144              | 3          |
| <b>OP-2334 (CFAP300/ C11orf70)</b>  | 0           | 199             | 199              | 3          |
| <b>OP-516 (LRRC6)</b>               | 0           | 279             | 279              | 3          |

**S6 Fig. Quantification of DNAI1 immunofluorescence (IF) in sperm of healthy control and dynein preassembly mutant individuals.** (A) Graph representing the quantification analysis performed for the DNAI1 IF on sperm. In control sperm 97% of cells display a panaxonemal localization of DNAI1, whereas in 3% of sperm immunoreactivity against DNAI1 is not observed. By contrast, in 100% of sperm cells counted for each dynein preassembly mutant individual, DNAI1 is not localized along the flagellar length. (B) Table describing the total number of cells counted per group and localization pattern observed. The quantification analysis for sperm cells represents three independent experiments.
