# Supplementary material for: Defects in the cytoplasmic assembly of axonemal dynein arms cause morphological abnormalities and dysmotility in sperm cells leading to male infertility
Source: PubMed Central journal article supplement (PMC7909641; doi:10.1371/journal.pgen.1009306), 2021-02-26
Supplement: pgen.1009306.s011.pdf [file pgen.1009306.s011.pdf]

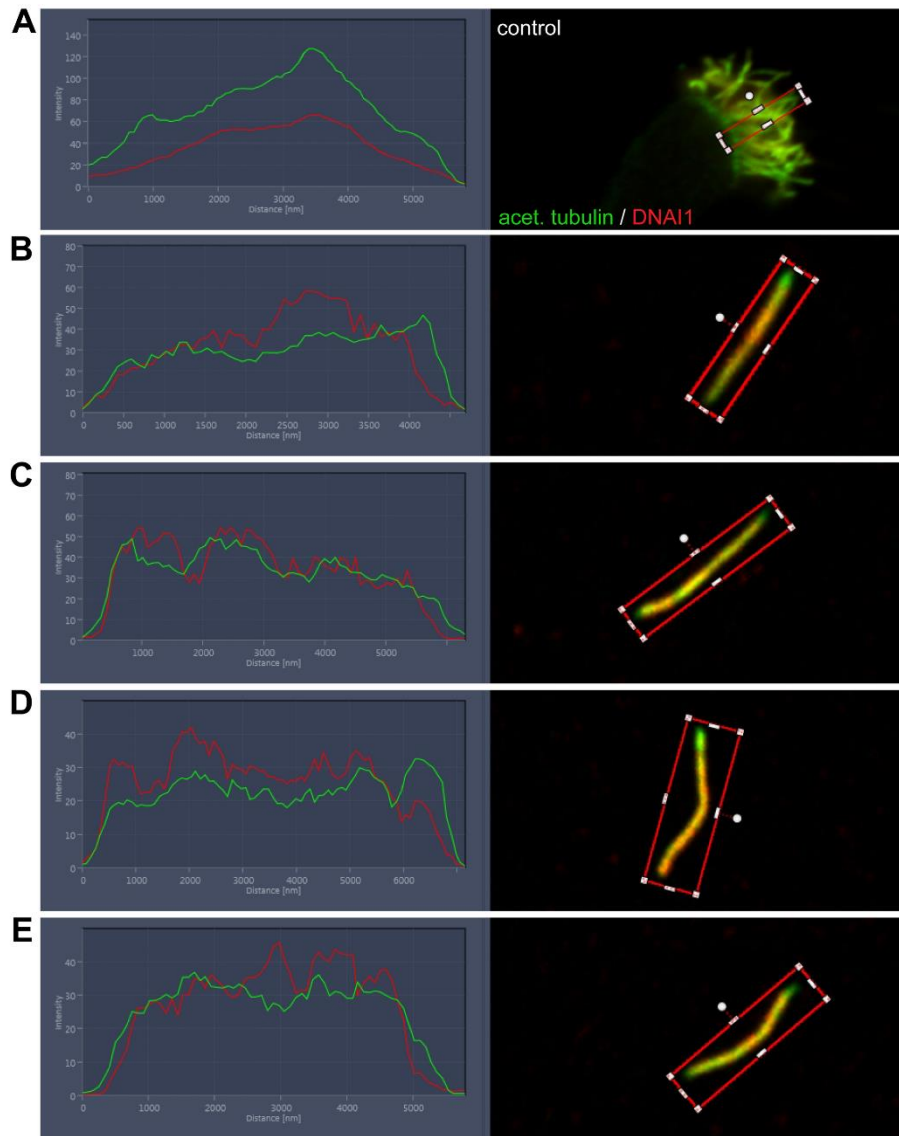

**S11 Fig. Measurement of the DNAI1 fluorescence intensity along the ciliary axonemes of control respiratory cells.** Intensity profile of DNAI1 signal (red) shows a normal distribution of DNAI1 along the ciliary axoneme in control samples of ciliated respiratory cells and single cilia. The red boxes indicate the path of the intensity profile. Five representative examples are shown.
