# Supplementary material for: Defects in the cytoplasmic assembly of axonemal dynein arms cause morphological abnormalities and dysmotility in sperm cells leading to male infertility
Source: PubMed Central journal article supplement (PMC7909641; doi:10.1371/journal.pgen.1009306), 2021-02-26
Supplement: pgen.1009306.s014.pdf [file pgen.1009306.s014.pdf]

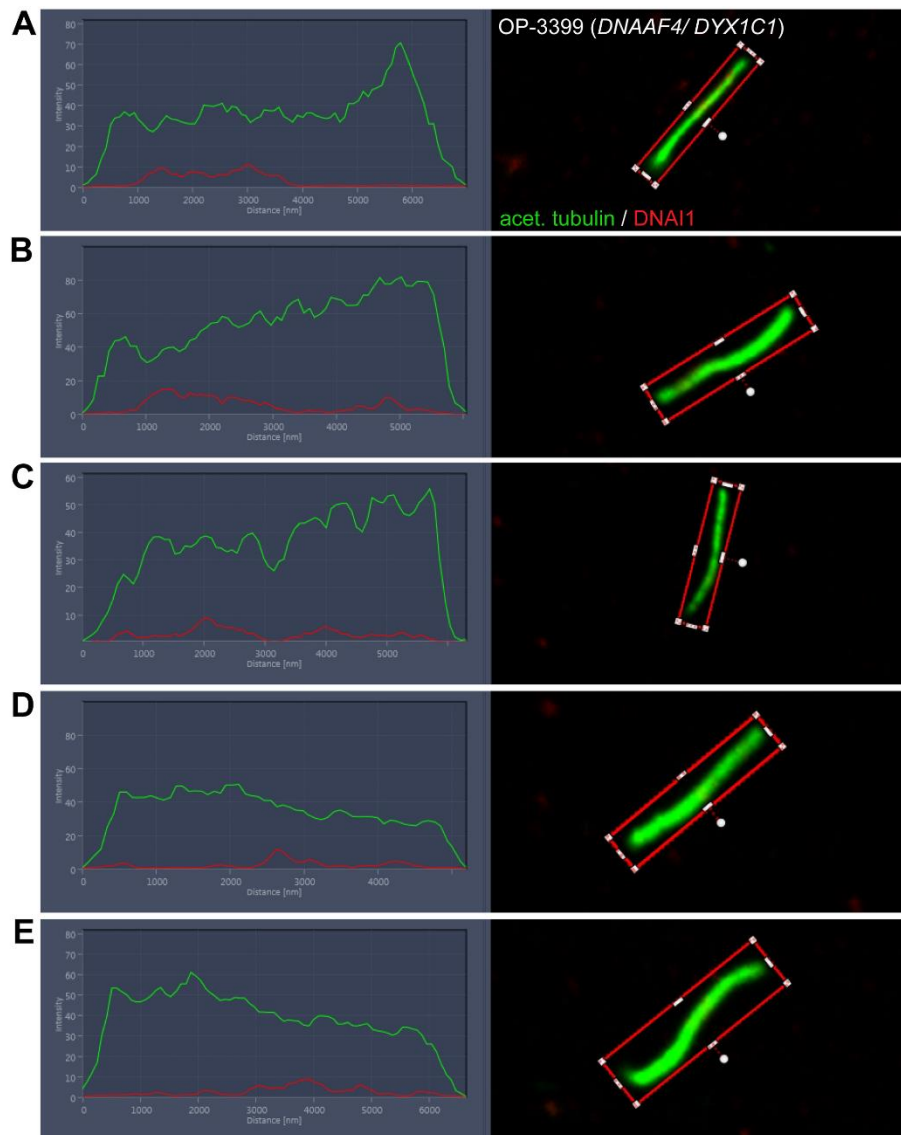

**S14 Fig. Measurement of the DNAI1 fluorescence intensity along the ciliary axonemes of *DNAAF4/DYX1C1*-mutant respiratory cells.** Intensity profile of DNAI1 signal (red) shows absence or severe reduction of DNAI1 in ciliary axonemes of *DNAAF4/DYX1C1*-mutant cilia (OP-3399) when compared to control cells (S11 Fig). The red boxes indicate the path of the intensity profile. Five representative examples are shown.
