# Supplementary material for: Defects in the cytoplasmic assembly of axonemal dynein arms cause morphological abnormalities and dysmotility in sperm cells leading to male infertility
Source: PubMed Central journal article supplement (PMC7909641; doi:10.1371/journal.pgen.1009306), 2021-02-26
Supplement: pgen.1009306.s025.pdf [file pgen.1009306.s025.pdf]

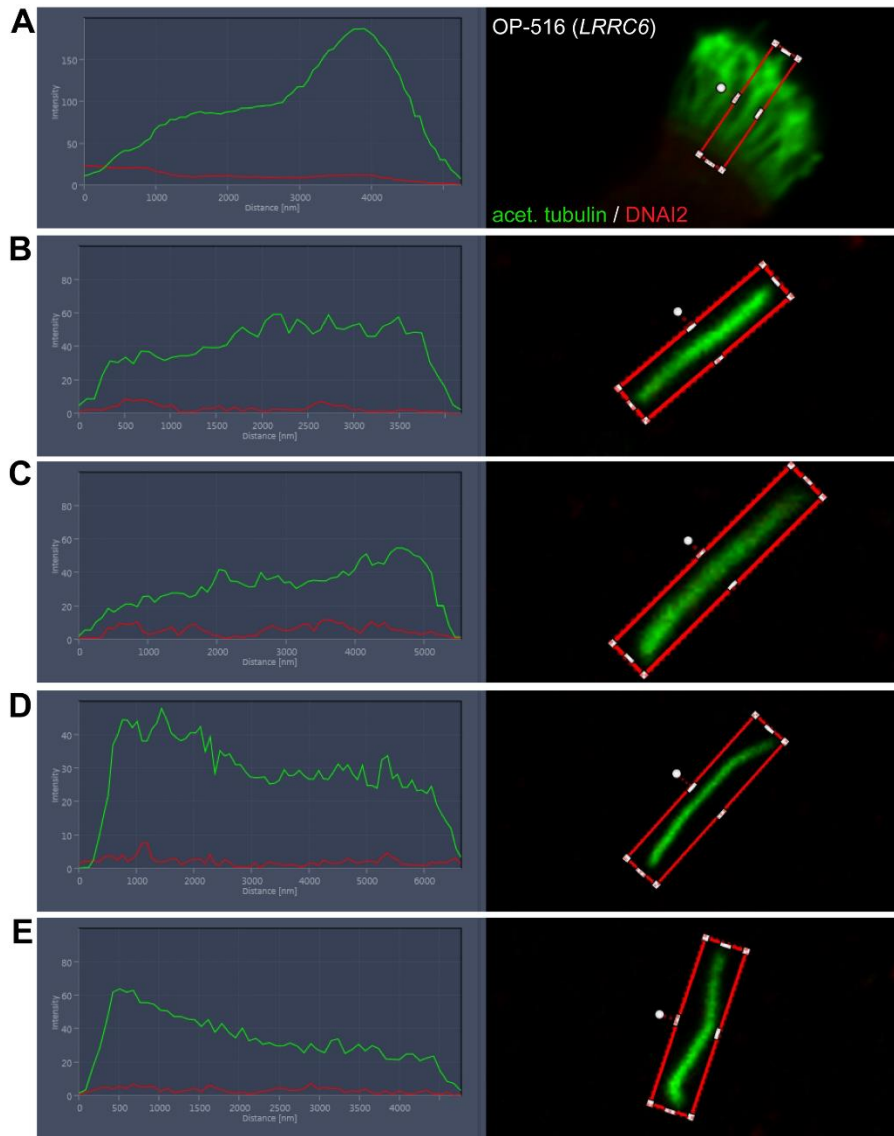

**S25 Fig. Measurement of the DNAI2 fluorescence intensity along the ciliary axonemes of *LRR6*-mutant respiratory cells.** Intensity profile of DNAI2 signal (red) shows absence or severe reduction of DNAI2 in ciliary axonemes of *LRR6*-mutant cilia (OP-2334), when compared to control cells (S19 Fig). The red boxes indicate the path of the intensity profile. Five representative examples are shown.
