# Supplementary material for: Defects in the cytoplasmic assembly of axonemal dynein arms cause morphological abnormalities and dysmotility in sperm cells leading to male infertility
Source: PubMed Central journal article supplement (PMC7909641; doi:10.1371/journal.pgen.1009306), 2021-02-26
Supplement: pgen.1009306.s026.pdf [file pgen.1009306.s026.pdf]

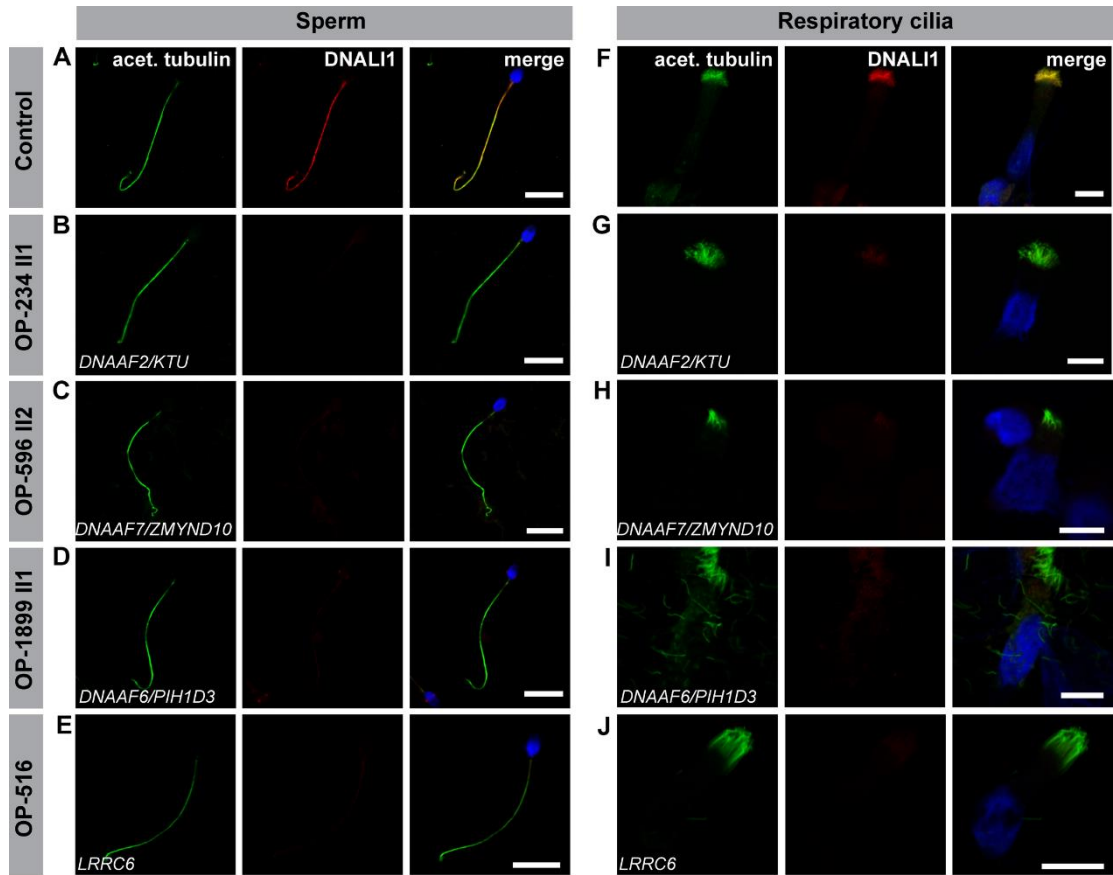

**S26 Fig. Mutant sperm flagella and respiratory cilia show absence or reduction of the IDA intermediate chain DNALI1.** Control (**A**) and mutant (**B-E**) sperm cells, as well as control (**F**) and mutant (**G-J**) respiratory cells were double-labeled with antibodies directed against acetylated  $\alpha$  tubulin (green) and the inner dynein arm intermediate light chain DNALI1 (red). Both antibodies co-localize along the flagella and cilia in cells from the unaffected control (yellow, **A**, **F**). In all mutant sperm and respiratory cells DNALI1 was not detected along the flagellar and ciliary axoneme (**B-E**, and **G-J**). Nuclei were stained with Hoechst33342 (blue). Scale bars represent 10  $\mu$ m.
