# Supplementary material for: Defects in the cytoplasmic assembly of axonemal dynein arms cause morphological abnormalities and dysmotility in sperm cells leading to male infertility
Source: PubMed Central journal article supplement (PMC7909641; doi:10.1371/journal.pgen.1009306), 2021-02-26
Supplement: pgen.1009306.s027.pdf [file pgen.1009306.s027.pdf]

**S1 Table. Primer pairs used for amplification of *DNAAF6* exons and *DNAI1* exon 3 in OP-3141.**

Fw, forward; Rv, reverse; bp, base pair; ic, internal control.

| Name                     | Sequence 5' – 3'          | Size   |
|--------------------------|---------------------------|--------|
| <i>DNAAF6</i> _Exon 1Fw  | TTGGCCAGAAAAGTCAAGCG      | 283 bp |
| <i>DNAAF6</i> _Exon 1Rv  | TTCTCCACCTTGCCCAACTT      |        |
| <i>DNAAF6</i> _Exon 2 Fw | CCAATGGAGTGATCCAGGGAA     | 399 bp |
| <i>DNAAF6</i> _Exon 2 Rv | TCAGCCTTGTTAGCTTCCTGTG    |        |
| <i>DNAAF6</i> _Exon 3 Fw | CACTGAGCTGGAAGTAGGGT      | 406 bp |
| <i>DNAAF6</i> _Exon 3 Rv | CTCCCTATAATTTCTCTACCAAGGA |        |
| <i>DNAAF6</i> _Exon 4 Fw | GTGTGAAGAAGAACAGGAGCA     | 317 bp |
| <i>DNAAF6</i> _Exon 4 Rv | CATGCCTTCCGTGTGTCAC       |        |
| <i>DNAAF6</i> _Exon 5 Fw | CTGAAGACCTGCAAGCACTT      | 362 bp |
| <i>DNAAF6</i> _Exon 5 Rv | CGTGAAACATAGCAACCACGA     |        |
| <i>DNAAF6</i> _Exon 6 Fw | TGGAGCCAGAAACCTTAGTCA     | 448 bp |
| <i>DNAAF6</i> _Exon 6 Rv | TTTTCTTCAGACTTTAGGGGTGA   |        |
| <i>DNAAF6</i> _Exon 7 Fw | AAATAGGGGCGCCAAAACAA      | 592 bp |
| <i>DNAAF6</i> _Exon 7 Rv | TTCGGCCTCCCAAAGTGTT       |        |
| <i>DNAI1_ic_Fw</i>       | TGAATGAAGGGGCTTTCTGT      | 266 bp |
| <i>DNAI1_ic_Rv</i>       | TCTGGGCAAGCTCCTAATCA      |        |
