# Supplementary material for: Defects in the cytoplasmic assembly of axonemal dynein arms cause morphological abnormalities and dysmotility in sperm cells leading to male infertility
Source: PubMed Central journal article supplement (PMC7909641; doi:10.1371/journal.pgen.1009306), 2021-02-26
Supplement: pgen.1009306.s028.pdf [file pgen.1009306.s028.pdf]

**S2 Table. Primer sequences used for Sanger Sequencing.** Fw, forward; Rv, reverse; bp, base pair.

| <b>Name</b>              | <b>Sequence 5' – 3'</b>     | <b>Size</b> |
|--------------------------|-----------------------------|-------------|
| <i>DNAAF4</i> Exon 2 Fw  | GGTAACCCCAAGAATCGGCA        | 549 bp      |
| <i>DNAAF4</i> Rv         | CCAGGGCTTCCTCATATGCC        |             |
| <i>DNAAF7</i> Exon1 Fw   | GCAACTGTCCTGTCCCAGAC        | 455 bp      |
| <i>DNAAF7</i> Exon1 Rv   | GTCCACGTGTGTGCATTAGG        |             |
| <i>DNAAF7</i> Exon5-6 Fw | AGGGAGATTGTGTCTGTGTGG       | 434 bp      |
| <i>DNAAF7</i> Exon5-6 Rv | CTTCCAGCCCTCCACAGTAG        |             |
| <i>LRRC6</i> Exon5 Fw    | CTTTTGGGAAGTGCCATTGT        | 967 bp      |
| <i>LRRC6</i> Exon5 Rv    | TTGCATCATAAAACATTCTATTTTCTG |             |
