# Supplementary material for: Defects in the cytoplasmic assembly of axonemal dynein arms cause morphological abnormalities and dysmotility in sperm cells leading to male infertility
Source: PubMed Central journal article supplement (PMC7909641; doi:10.1371/journal.pgen.1009306), 2021-02-26
Supplement: pgen.1009306.s029.pdf [file pgen.1009306.s029.pdf]

**S3 Table. List of 33 genes in customized PCD panel.**

| <b>Gene symbol</b> | <b>RefSeq database accession number - transcript</b> |
|--------------------|------------------------------------------------------|
| <i>ARMC4</i>       | (NM_018076.4)                                        |
| <i>CFAP298</i>     | (NM_021254.2)                                        |
| <i>CCDC103</i>     | (NM_213607.2)                                        |
| <i>CCDC11</i>      | (NM_145020.4)                                        |
| <i>CCDC114</i>     | (NM_144577.3)                                        |
| <i>CCDC151</i>     | (NM_145045.4)                                        |
| <i>CCDC164</i>     | (NM_145038.4)                                        |
| <i>CCDC39</i>      | (NM_181426.1)                                        |
| <i>CCDC40</i>      | (NM_017950.3)                                        |
| <i>CCDC65</i>      | (NM_033124.4)                                        |
| <i>CCNO</i>        | (NM_021147.4)                                        |
| <i>DNAAF1</i>      | (NM_178452.5)                                        |
| <i>DNAAF2</i>      | (NM_018139.2)                                        |
| <i>DNAAF3</i>      | (NM_001256714.1)                                     |
| <i>DNAAF4</i>      | (NM_130810.3)                                        |
| <i>DNAH11</i>      | (NM_001277115.1)                                     |
| <i>DNAH5</i>       | (NM_001369.2)                                        |
| <i>DNAH9</i>       | (NM_001372.3)                                        |
| <i>DNAI1</i>       | (NM_012144.3)                                        |
| <i>DNAI2</i>       | (NM_023036.4)                                        |
| <i>DNAL1</i>       | (NM_031427.3)                                        |
| <i>GAS8</i>        | (NM_001286209.1)                                     |
| <i>DNAAF5</i>      | (NM_017802.3)                                        |
| <i>HYDIN</i>       | (NM_001270974.1)                                     |
| <i>LRRC6</i>       | (NM_012472.5)                                        |
| <i>MCIDAS</i>      | (NM_001190787.1)                                     |
| <i>NME8</i>        | (NM_016616.4)                                        |
| <i>RPGR</i>        | (NM_000328.2)                                        |
| <i>RSPH1</i>       | (NM_080860.3)                                        |
| <i>RSPH3</i>       | (NM_031924.4)                                        |
| <i>RSPH4A</i>      | (NM_001010892.2)                                     |
| <i>RSPH9</i>       | (NM_152732.4)                                        |
| <i>SPAG1</i>       | (NM_172218.2)                                        |
