# Supplementary material for: Defects in the cytoplasmic assembly of axonemal dynein arms cause morphological abnormalities and dysmotility in sperm cells leading to male infertility
Source: PLoS Genet. 2021 Feb 26;17(2):e1009306. doi: 10.1371/journal.pgen.1009306 (PMC7909641; doi:10.1371/journal.pgen.1009306)
Supplement: S2 Appendix — (XLSX) [file pgen.1009306.s043.xlsx]

## Sheet: Dataset flagellar length
S2 Appendix. Dataset of sperm flagellar length (µm) - Control vs. Dynein preassembly mutant individuals.
Control	OP-146 II3 (DNAAF2)	OP-234 II1 (DNAAF2)	OP-3399 II1 (DNAAF4)	OP-1899 II1 (DNAAF6)	OP-3141 (DNAAF6)	OP-6 II5 (DNAAF7)	OP-596 II2 (DNAAF7)	OP-2334 (CFAP300)	OP-516 (LRRC6)
47.024	37.938	38.77	32.73	37.33	39.704	33.021	38.679	33.74	21.249
46.676	34.699	32.347	24.327	32.031	30.033	29.73	29.688	32.867	18.387
46.15	30.231	34.33	24.575	34.805	34.218	30.325	40.027	36.126	33.409
44.965	35.699	33.087	26.205	38.797	32.984	16.585	48.483	37.24	23.778
43.413	33.716	35.068	41.663	41.212	33.548	39.549	40.317	29.197	37.551
44.619	25.376	25.558	31.975	35.968	35.355	29.758	33.811	34.461	24.663
45.48	42.417	34.701	38.436	32.824	34.763	36.525	42.446	38.479	35.669
46.103	36.954	37.539	34.36	29.545	24.603	35.243	35.515	31.575	39.258
50.257	35.076	33.572	39.463	38.453	27.924	31.444	41.193	29.956	31.566
31.947	39.308	26.785	33.55	35.5	32.691	25.204	38.832	35.853	37.597
33.05	29.353	41.108	40.379	31.688	31.258	32.539	24.057	36.819	31.183
32.365	39.047	35.057	23.345	36.765	32.784	24.563	20.868	33.185	38.914
33.243	38.31	30.008	34	35.405	34.713	30.82	41.91	38.21	12.944
27.931	35.939	39.903	20.707	36.736	35.821	31.358	43.1	33.495	31.413
31.423	35.819	37.431	24.551	32.418	30.047	32.247	35.068	36.1	43.315
21.596	33.088	32.521	25.002	31.43	38.024	36.323	40.327	37.97	35.601
32.362	35.684	31.159	30.647	38.666	24.626	32.899	40.811	35.875	43.652
33.808	42.166	33.754	40.374	32.08	34.783	31.711	34.437	32.694	26.367
29.171	21.135	33.373	34.421	29.106	26.86	30.128	35.746	32.704	26.074
48.805	36.571	33.246	37.173	32.968	37.187	35.618	40.516	31.805	35.641
47.108	38.434	34.12	32.608	33.74	36.102	34.825	29.547	36.177	31.874
39.659	35.687	34.973	35.342	31.423	24.845	28.528	27.611	35.484	37.729
45.254	25.933	37.815	36.564	37.034	36.707	32.884	39.347	32.834	31.363
40.651	34.944	35.342	32.721	20.061	36.126	31.202	43.675	38.321	32.299
54.298	29.507	32.886	32.924	43.412	17.151	30.353	43.724	38.31	37.011
39.858	38.157	30.576	34.902	36.555	35.361	39.071	39.496	41.004	35.383
47.335	30.13	37.864	34.289	37.833	35.271	24.368	41.624	32.886	13.717
48.689	34.581	34.418	35.757	36.057	27.107	36.453	39.693	41.895	38.582
44.934	39.882	27.722	44.87	30.223	43.344	38.352	38.965	32.279	33.623
43.233	38.27	36.747	35.871	38.302	34.189	35.296	37.915	35.936	21.352
45.793	23.338	32.806	34.441	31.697	32.555	28.986	41.408	38.899	21.993
45.175	38.638	38.498	29.87	39.107	31.684	34.98	39.195	24.948	18.532
40.552	36.797	33.793	31.83	31.862	37.939	36.077	42.914	30.977	39.014
43.875	40.741	32.923	25.43	29.612	26.314	29.183	37.625	32.215	36.272
43.722	29.876	36.264	31.1	38.586	35.147	21.484	31.03	32.735	36.93
46.813	34.039	37.27	29.197	32.328	30.35	28.938	35.798	31.724	22.616
42.163	34.523	33.043	32.225	35.074	17.198	39.66	25.63	37.203	42.07
34.122	33.042	35.893	35.834	38.396	34.353	22.609	41.094	30.969	32.859
38.681	32.188	36.252	35.598	27.029	13.076	28.663	39.247	31.804	27.438
43.81	37.501	40.824	22.293	36.764	31.6	31.387	42.203	32.962	33.166
43.01	34.17	30.204	31.596	32.315	31.451	28.952	30.452	35.703	28.513
44.429	36.886	39.354	33.247	36.176	28.742	34.238	42.088	26.155	32.229
47.459	29.699	27.222	38.407	35.565	32.919	33.807	29.573	32.106	42.622
44.403	37.136	31.811	33.248	35.451	32.744	27.375	30.203	37.097	35.443
45.988	41.694	34.164	33.434	34.811	37.458	37.888	38.247	37.314	35.03
41.505	26.993	33.972	29.443	37.18	35.186	35.426	34.657	36.508	22.968
44.122	39.608	30.027	32.014	42.962	36.248	28.316	30.321	36.277	29.443
42.379	38.007	32.121	34.415	39.544	23.309	33.989	40.97	34.716	33.146
36.963	35.272	29.045	31.487	36.875	36.367	33.284	42.078	35.384	32.622
46.308	32.061	34.223	30.522	35.676	34.666	32.025	42.947	41.403	42.565
48.606	38.629	42.251		31.692	36.239	32.314	38.008	36.086	43.877
	35.881	35.964		40.088	20.212	30.306	42.201	33.53	20.615
	39.362	22.244		39.12	32.888	26.541	43.93	33.545	35.566
	36.138	36.572			38.681	28.143	40.1	37.253	31.752
	35.151	31.393			33.91	30.563	36.869		38.064
	38.855	28.677				38.368	41.48		39.347
	28.597	31.515				30.338	39.127		33.763
	32.179	31.496				29.486	43.713		19.582
	31.442	33.366				18.84	33.903		34.074
	37.373	38.797					41.845		37.738
	33.929	33.987					38.865		41.333
	41.453	54.252					35.628
	28.968	38.314					42.971
	34.405						39.855
	35.774
	31.437

## Sheet: Brown-Forsythe ANOVA test
S2 Appendix. Statistical analysis of sperm flagellar length measurement - Brown-Forsythe ANOVA test.
Table Analyzed	Dataset flagellar length
Brown-Forsythe ANOVA test
F* (DFn, DFd)	19,02 (9,000, 464,5)
P value	<0,0001
P value summary	****
Significant diff. among means (P < 0.05)?	Yes
Welch's ANOVA test
W (DFn, DFd)	14,72 (9,000, 227,7)
P value	<0,0001
P value summary	****
Significant diff. among means (P < 0.05)?	Yes
Data summary
Number of treatments (columns)	10
Number of values (total)	576

## Sheet: Welch's t-test
S2 Appendix. Statistical analysis of sperm flagellar length measurement- Two tailed t-test with Welch's correction.
Table Analyzed	Dataset flagellar length		Table Analyzed	Dataset flagellar length		Table Analyzed	Dataset flagellar length		Table Analyzed	Dataset flagellar length		Table Analyzed	Dataset flagellar length
Column B	OP-146 II3 (DNAAF2)		Column C	OP-234 II1 (DNAAF2)		Column D	OP-3399 (DNAAF4)		Column E	OP-1899 II1 (DNAAF6)		Column F	OP-3141 (DNAAF6)
vs.	vs.		vs.	vs.		vs.	vs.		vs.	vs.		vs.	vs.
Column A	Control		Column A	Control		Column A	Control		Column A	Control		Column A	Control
Unpaired t test with Welch's correction			Unpaired t test with Welch's correction			Unpaired t test with Welch's correction			Unpaired t test with Welch's correction			Unpaired t test with Welch's correction
P value	<0,0001		P value	<0,0001		P value	<0,0001		P value	<0,0001		P value	<0,0001
P value summary	****		P value summary	****		P value summary	****		P value summary	****		P value summary	****
Significantly different (P < 0.05)?	Yes		Significantly different (P < 0.05)?	Yes		Significantly different (P < 0.05)?	Yes		Significantly different (P < 0.05)?	Yes		Significantly different (P < 0.05)?	Yes
One- or two-tailed P value?	Two-tailed		One- or two-tailed P value?	Two-tailed		One- or two-tailed P value?	Two-tailed		One- or two-tailed P value?	Two-tailed		One- or two-tailed P value?	Two-tailed
Welch-corrected t, df	t=6,478, df=84,15		Welch-corrected t, df	t=6,850, df=86,42		Welch-corrected t, df	t=7,803, df=94,21		Welch-corrected t, df	t=6,222, df=83,35		Welch-corrected t, df	t=8,015, df=100,5
How big is the difference?			How big is the difference?			How big is the difference?			How big is the difference?			How big is the difference?
Mean of column A	41.79		Mean of column A	41.79		Mean of column A	41.79		Mean of column A	41.79		Mean of column A	41.79
Mean of column B	34.79		Mean of column C	34.29		Mean of column D	32.59		Mean of column E	35.02		Mean of column F	31.99
Difference between means (B - A) ± SEM	-7,005 ± 1,081		Difference between means (C - A) ± SEM	-7,499 ± 1,095		Difference between means (D - A) ± SEM	-9,203 ± 1,179		Difference between means (E - A) ± SEM	-6,766 ± 1,087		Difference between means (F - A) ± SEM	-9,801 ± 1,223
95% confidence interval	-9,155 to -4,854		95% confidence interval	-9,675 to -5,323		95% confidence interval	-11,54 to -6,861		95% confidence interval	-8,928 to -4,603		95% confidence interval	-12,23 to -7,375
R squared (eta squared)	0.3328		R squared (eta squared)	0.3519		R squared (eta squared)	0.3926		R squared (eta squared)	0.3172		R squared (eta squared)	0.39
F test to compare variances			F test to compare variances			F test to compare variances			F test to compare variances			F test to compare variances
F, DFn, Dfd	2,143, 50, 65		F, DFn, Dfd	2,050, 50, 62		F, DFn, Dfd	1,648, 50, 49		F, DFn, Dfd	2,559, 50, 52		F, DFn, Dfd	1,252, 50, 54
P value	0.004		P value	0.0075		P value	0.0822		P value	0.001		P value	0.4175
P value summary	**		P value summary	**		P value summary	ns		P value summary	***		P value summary	ns
Significantly different (P < 0.05)?	Yes		Significantly different (P < 0.05)?	Yes		Significantly different (P < 0.05)?	No		Significantly different (P < 0.05)?	Yes		Significantly different (P < 0.05)?	No
Data analyzed			Data analyzed			Data analyzed			Data analyzed			Data analyzed
Sample size, column A	51		Sample size, column A	51		Sample size, column A	51		Sample size, column A	51		Sample size, column A	51
Sample size, column B	66		Sample size, column C	63		Sample size, column D	50		Sample size, column E	53		Sample size, column F	55
Table Analyzed	Dataset flagellar length		Table Analyzed	Dataset flagellar length		Table Analyzed	Dataset flagellar length		Table Analyzed	Dataset flagellar length
Column G	OP-6 II5 (DNAAF7)		Column H	OP-596 II2 (DNAAF7)		Column I	OP-2334 (CFAP300)		Column J	OP-516 (LRRC6)
vs.	vs.		vs.	vs.		vs.	vs.		vs.	vs.
Column A	Control		Column A	Control		Column A	Control		Column A	Control
Unpaired t test with Welch's correction			Unpaired t test with Welch's correction			Unpaired t test with Welch's correction			Unpaired t test with Welch's correction
P value	<0,0001		P value	0.0009		P value	<0,0001		P value	<0,0001
P value summary	****		P value summary	***		P value summary	****		P value summary	****
Significantly different (P < 0.05)?	Yes		Significantly different (P < 0.05)?	Yes		Significantly different (P < 0.05)?	Yes		Significantly different (P < 0.05)?	Yes
One- or two-tailed P value?	Two-tailed		One- or two-tailed P value?	Two-tailed		One- or two-tailed P value?	Two-tailed		One- or two-tailed P value?	Two-tailed
Welch-corrected t, df	t=9,326, df=90,20		Welch-corrected t, df	t=3,415, df=95,97		Welch-corrected t, df	t=6,898, df=73,58		Welch-corrected t, df	t=7,155, df=109,8
How big is the difference?			How big is the difference?			How big is the difference?			How big is the difference?
Mean of column A	41.79		Mean of column A	41.79		Mean of column A	41.79		Mean of column A	41.79
Mean of column G	31.34		Mean of column H	37.87		Mean of column I	34.65		Mean of column J	32.17
Difference between means (G - A) ± SEM	-10,45 ± 1,120		Difference between means (H - A) ± SEM	-3,921 ± 1,148		Difference between means (I - A) ± SEM	-7,142 ± 1,035		Difference between means (J - A) ± SEM	-9,620 ± 1,345
95% confidence interval	-12,68 to -8,224		95% confidence interval	-6,200 to -1,642		95% confidence interval	-9,205 to -5,079		95% confidence interval	-12,29 to -6,956
R squared (eta squared)	0.4909		R squared (eta squared)	0.1083		R squared (eta squared)	0.3927		R squared (eta squared)	0.3179
F test to compare variances			F test to compare variances			F test to compare variances			F test to compare variances
F, DFn, Dfd	1,875, 50, 58		F, DFn, Dfd	1,491, 50, 63		F, DFn, Dfd	3,813, 50, 53		F, DFn, Dfd	1,321, 60, 50
P value	0.0215		P value	0.1332		P value	<0,0001		P value	0.3134
P value summary	*		P value summary	ns		P value summary	****		P value summary	ns
Significantly different (P < 0.05)?	Yes		Significantly different (P < 0.05)?	No		Significantly different (P < 0.05)?	Yes		Significantly different (P < 0.05)?	No
Data analyzed			Data analyzed			Data analyzed			Data analyzed
Sample size, column A	51		Sample size, column A	51		Sample size, column A	51		Sample size, column A	51
Sample size, column G	59		Sample size, column H	64		Sample size, column I	54		Sample size, column J	61
